# Supplementary material for: Dinocyst assemblage constraints on oceanographic and atmospheric processesin the eastern equatorial Atlantic over the last 44 kyr
Source: Copernicus journal article supplement (doi:10.5194/bg-13-4823-2016), 2016-08-29
Supplement: Supplementary file [file bg-13-4823-2016-supplement-title-page.pdf › bg-13-4823-2016-supplement-title-page.pdf]

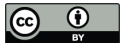

*Supplement of*

**Dinocyst assemblage constraints on oceanographic and atmospheric processes in the eastern equatorial Atlantic over the last 44 kyr**

**William Hardy et al.**

*Correspondence to:* William Hardy ([william.hardy@univ-brest.fr](mailto:william.hardy@univ-brest.fr))

- [bg-13-4823-2016-supplement-title-page.pdf](#)
- [KZAI01data.xls](#)

The copyright of individual parts of the supplement might differ from the CC-BY 3.0 licence.
